# Supplementary material
Source: PubMed Central journal article supplement (PMC4958459)
Supplement: NIHMS800939-supplement-Supplemental.pdf [file NIHMS800939-supplement-Supplemental.pdf]

## Supporting Information

### **The N-B Interaction through a Water Bridge: Understanding the Chemoselectivity of a Fluorescent Protein Based Probe for Peroxynitrite**

Zhi-jie Chen,<sup>†</sup> Ziqi Tian,<sup>†</sup> Karen Kallio,<sup>‡</sup> April L Oleson,<sup>‡</sup> Ao Ji,<sup>†</sup> Dan Borchardt,<sup>†</sup>  
De-en Jiang,<sup>†</sup> S. James Remington,<sup>‡\*</sup> and Hui-wang Ai<sup>†\*</sup>

<sup>†</sup> Department of Chemistry, University of California at Riverside, 501 Big Springs Road, Riverside, CA 92521, United States of America

<sup>‡</sup> Department of Physics and Institute of Molecular Biology, University of Oregon, Eugene, OR 97403, United States of America

**Table S1.** Oligonucleotides used in this study.

| <b>Primer name</b> | <b>Nucleotide Sequence</b>                                              |
|--------------------|-------------------------------------------------------------------------|
| pnGFP-F            | 5'- TTTTGGGCTAACAGGAGGAATTAACCATG -3'                                   |
| pnGFP-R            | 5'- CAGCCAAGCTTAATGGTGATGGTGATGGTG -3'                                  |
| pBAD-F             | 5'- ATGCCATAGCATT TTTATCC -3'                                           |
| pBAD-R             | 5'- GATTTAATCTGTATCAGG -3'                                              |
| pnGFP-T173G-F      | 5'- CTCGTGACCACCTTGGGCTAGGGCGTGCAGTGC -3'                               |
| pnGFP-T173G-R      | 5'- GCACTGCACGCCCTAGCCCAAGGTGGTCACGAG -3'                               |
| pnGFP-T64F-F       | 5'- CACTACCTGAGCTTCCAGTCCGTGCTG -3'                                     |
| pnGFP-T64F-R       | 5'- CAGCACGGACTGGAAGCTCAGGTAGTG -3'                                     |
| pnGFP-S66A-F       | 5'- CACTACCTGAGCACCCAGGCCGTGCTGAGCAAAGACCCC -3'                         |
| pnGFP-S66A-R       | 5'- GGGGTCTTTGCTCAGCACGGCCTGGGTGCTCAGGTAGTG -3'                         |
| pnGFP-H9T-F        | 5'- TTTTGGGCTAACAGGAGGAATTAACCATGGGCTCGAGCACTTACAACAGCA<br>CCAAGGTC -3' |

**Table S2.** Crystallographic data, refinement and atomic model statistics.

| Protein                                                     | pnGFP1.5-Y.Cro                       |
|-------------------------------------------------------------|--------------------------------------|
| Total reflections                                           | 1,606,287                            |
| Unique reflections observed                                 | 14,821                               |
| Space Group                                                 | P 43 21 2                            |
| Cell dimensions (a, b, c) (Å)                               | 57.26, 57.26, 185.39                 |
| Resolution (Å) <sup>a</sup>                                 | 25.-2.75 (2.80-2.75)                 |
| Completeness <sup>a</sup> (%)                               | 99.9 (100.0)                         |
| Average $I/\sigma^a$                                        | 80.4 (8.0)                           |
| $R_{\text{merge}}^{a,b}$                                    | 0.089 (0.926)                        |
| $R_{\text{pim}}$ , $CC_{1/2}$ , $CC^*$ (shell) <sup>c</sup> | (0.129),(0.982),(0.995)              |
| Atomic model statistics                                     |                                      |
| Asymmetric unit                                             | 1 protein chain, 16 H <sub>2</sub> O |
| Crystallographic $R$ -factor <sup>d</sup> (shell 3.17-2.75) | 0.203 (0.249)                        |
| R-free                                                      | 0.293 (0.336)                        |
| R-factor, all data combined                                 | 0.210                                |
| Average B-factors, all atoms (Å <sup>2</sup> )              | 74.6                                 |
| rms bond lengths (Å)                                        | 0.010                                |
| rms bond angles (degrees)                                   | 1.44                                 |

<sup>a</sup> Values in parentheses indicate statistics for the highest resolution shell.

<sup>b</sup> $R_{\text{merge}} = \sum_i \sum_j (|I_{ij} - \langle I \rangle_i) / \sum_i \sum_j \langle I \rangle_i$ , where  $I_{ij}$  is the amplitude of the  $j^{\text{th}}$  observation of reflection  $i$  and  $\langle I \rangle_i$  is the mean value of observations  $I_{ij}$ .

<sup>c</sup>For definitions of these quantities see Karplus & Diederichs[1]

<sup>d</sup> $R$ -factor =  $\sum ||F_o| - |F_c|| / \sum |F_o|$ , where  $F_o$  and  $F_c$  are the observed and calculated structure amplitudes.

[1]. Karplus, P. A.; Diederichs, K., Linking Crystallographic Model and Data Quality. *Science* **2012**, 336, 1030-1033.

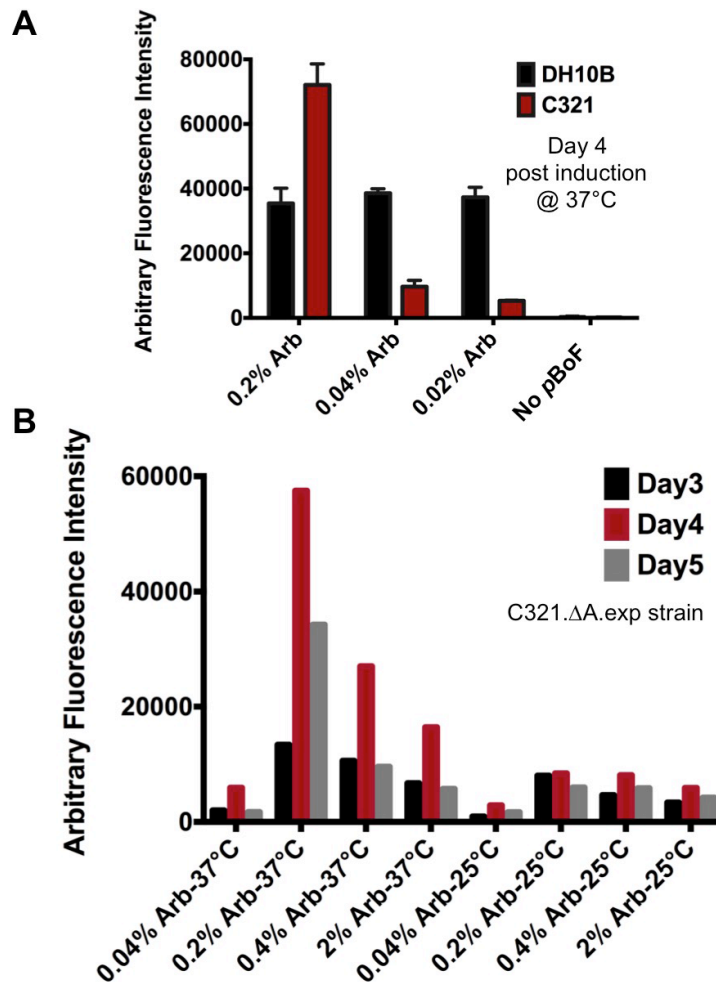

**Figure S1. Optimization of conditions for preparation of *pBoF*-containing proteins.** To optimize the expression condition, the plasmid *pBAD-mCherry<sub>151TAG</sub>* was used to co-transform DH10B or C321.ΔA.exp *E. coli* cells along with the plasmid *pEvol-pBoF*. Cells were grown on LB agar plates containing 100 μg/mL ampicillin and 50 μg/ml chloramphenicol at 37°C overnight. Individual colonies from the plates were then inoculated in 2 mL TB containing 1 mM *pBoF*, 100 μg/mL ampicillin, 50 μg/ml chloramphenicol and various concentrations of L-arabinose (0.02–2%). Cells were next grown at 25°C or 37°C, and fluorescence intensities of corresponding cell lysates were quantified each day thereafter. To prepare cell lysate, 500 μL of cell culture was pelleted by centrifugation and lysed with 100 μL B-PER bacterial protein extraction reagent. Fluorescence emission intensities at 610 nm were then measured on a plate reader with excitation at 560 nm. Panel (A) shows the fluorescence of *pBoF*-containing mCherry expressed in DH10B (black) or C321.ΔA.exp (red) *E. coli* cells with different amounts of L-arabinose at 37 °C. Panel (B) shows the fluorescence of *pBoF*-containing mCherry expressed in C321.ΔA.exp, after varying the concentration of L-arabinose, induction temperature, and the length of induction period.

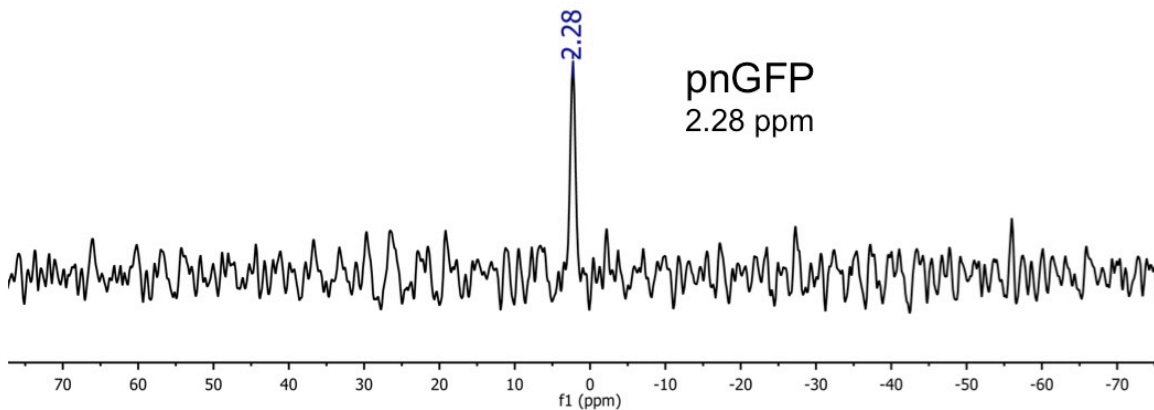

**Figure S2.**  $^{11}\text{B}$  NMR spectra for pnGFP.

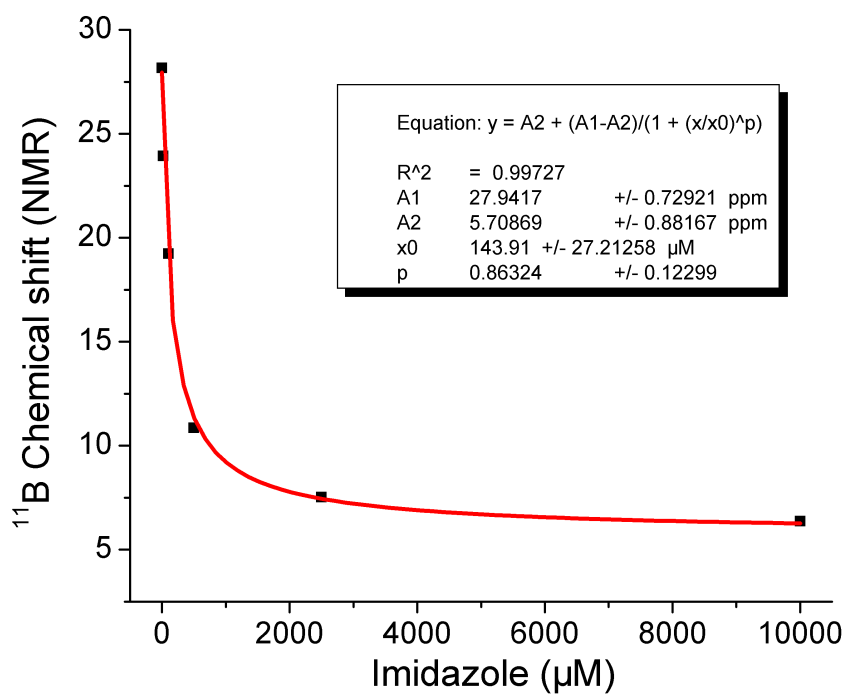

**Figure S3.**  $^{11}\text{B}$  NMR chemical shifts for phenylboronic acid (20 mM) in 20 mM phosphate buffer (pH 7.4,  $\text{D}_2\text{O}$  (v):  $\text{H}_2\text{O}$  (v) = 1:1), titrated with 0 mM, 20 mM, 100 mM, 500 mM, 2.5 M or 10 M imidazole. The data were fitted with the equation shown on the graph, which identified the extreme chemical shift for phenylboronic acid/imidazole complex to be 5.7 +/- 0.9 ppm.
